# Supplementary material for: Microsatellite markers-aided dissection of iron, zinc and cadmium accumulation potential in Triticum aestivum
Source: PeerJ. 2023 Apr 17;11:e15229. doi: 10.7717/peerj.15229 (PMC10117381; doi:10.7717/peerj.15229)
Supplement: Supplemental Information 6 [file peerj-11-15229-s006.xlsx]

## Sheet: Zn & Fe
Table: Averaged raw data of Zinc and Iron concertration (mg/Kg) obtained from guarded plants 189 wheat genotyprs in three replications.
Sr No.	Genotypes	Zn concentration							Fe concentration
		Control	T1	T2	T3	T4	T5		Control	T1	T2	T3	T4	T5
			Cd10	Zn5	Zn20	Cd10+Zn5	Cd10+Zn20			Cd10	Zn5	Zn20	Cd10+Zn5	Cd10+Zn20
1	FA-1	35.6586	28.7406	39.1695	49.834	30.2776	34.7036		69.2986	17.6596	67.9126	67.8413	25.987	28.5857
2	FA-2	37.5145	30.9767	42.8976	44.6095	33.6333	38.0641		36.2032	7.61797	34.755	39.7005	10.6437	11.6017
3	FA-3	36.5796	27.9175	45.4605	52.4506	30.1867	33.4962		53.7824	15.0793	52.1689	58.5077	18.0709	18.4323
4	FA-4	33.4552	25.8064	46.0907	50.4086	29.0201	31.3297		58.7029	27.1084	58.1159	57.1753	43.2054	44.5015
5	FA-5	37.1749	39.8848	50.6305	61.502	43.7969	47.2137		44.9441	29.6671	49.4385	46.7589	39.1463	39.5378
6	FA-6	37.6314	34.4969	41.1084	58.8849	39.0883	40.5023		47.2736	37.2599	61.4557	61.4788	51.6228	53.1715
7	FA-7	41.6103	36.5907	39.9951	48.3358	39.2917	43.7132		44.2639	12.9476	59.3137	71.792	15.4038	16.7902
8	FA-8	46.9097	39.0353	36.8218	45.6535	40.5023	42.7244		35.3269	9.46782	42.3217	53.4811	12.0475	10.8428
9	FA-9	34.5316	28.0827	45.4591	55.8893	30.4748	33.8159		43.6528	19.5995	41.0337	53.2236	23.769	27.3343
10	FA-10	37.0846	39.4158	50.1694	66.8966	41.1435	48.8386		20.0936	6.94528	16.0749	20.6374	8.08768	9.0582
11	FA-11	36.3894	36.1099	46.6247	59.9606	41.2293	44.2833		58.1323	11.5519	45.3432	56.3157	12.0915	13.6634
12	FA-12	42.0484	44.9262	40.3206	43.8173	51.9033	57.1482		62.3975	47.181	82.3648	95.7538	59.9016	68.2879
13	FA-13	41.3787	35.7724	45.2444	50.2495	40.1593	42.6818		38.8395	11.6362	43.1118	42.1929	13.9822	15.5203
14	FA-14	35.3496	30.0604	30.4089	32.6241	30.3082	36.5329		50.1323	28.0308	54.6442	54.0144	32.2852	35.1909
15	FA-15	35.3112	28.9923	47.0232	59.6868	32.1623	36.2799		58.9407	17.0666	58.3513	57.6792	29.0578	31.3824
16	FA-16	39.2329	32.5941	39.8988	51.6246	32.6302	41.3971		38.1803	9.56394	37.0349	44.5297	12.4086	13.7735
17	FA-17	31.1784	25.7088	52.1016	61.4365	26.8868	30.3106		36.2881	9.04729	29.0305	40.5319	12.2472	13.4842
18	FA-18	31.8383	27.9195	46.0499	56.4578	30.2381	29.9407		21.6348	6.94278	20.553	28.766	9.44488	10.4744
19	FA-19	32.9749	29.8377	45.1043	49.1886	30.5794	36.9548		27.1634	7.75281	30.9662	37.878	11.0283	12.2304
20	FA-20	42.767	38.4434	43.7431	55.787	41.4878	42.7546		36.4569	16.8039	54.6854	49.3159	21.1304	23.6661
21	FA-21	47.4263	30.428	47.4659	52.4506	33.5964	41.473		59.5229	39.9339	77.3797	116.226	55.8324	68.1156
22	FA-22	36.1281	28.3266	42.4453	56.0319	31.0284	31.2875		48.4445	37.9338	59.5867	71.7824	45.344	50.3319
23	FA-23	42.1108	35.1925	40.2766	47.1101	37.9987	44.532		58.7728	39.9533	70.5273	77.1272	58.8021	57.6261
24	FA-24	39.9738	33.0681	55.6929	59.491	35.9572	39.9286		39.2661	18.0335	38.8734	42.8161	22.8434	20.5591
25	FA-25	40.2436	32.5364	56.4149	64.8162	37.9853	36.5563		23.5428	17.6911	16.48	17.7861	33.3249	25.9934
26	FA-26	45.1924	39.1417	45.6535	51.0067	41.6134	46.8898		45.7303	12.0393	35.6696	43.9481	12.5758	13.8334
27	FA-27	37.7768	30.4061	38.6145	42.8267	33.9171	39.3844		83.5272	17.5012	66.8218	80.0055	15.7866	17.9968
28	FA-28	35.6978	32.8296	30.4109	41.3319	33.2431	34.3717		15.2672	4.22164	3.05344	3.9201	4.7023	5.07848
29	FA-29	39.7328	48.3489	49.9227	63.4218	54.4634	59.9647		49.0272	22.408	6.37354	7.78921	23.6801	24.8641
30	FA-30	49.9001	43.4803	45.9367	62.1797	48.6251	54.7443		39.7437	25.1682	35.3719	32.7638	40.2087	40.6108
31	FA-31	38.4151	32.9509	49.9364	59.3308	43.9936	40.1593		39.2673	30.5874	58.9009	61.7631	48.0867	54.0014
32	FA-32	41.5922	36.2936	46.4084	55.9845	31.013	43.8008		38.8468	11.2482	46.6162	55.8532	14.6452	16.0805
33	FA-33	33.9007	28.3883	45.0571	59.3843	29.1376	35.8927		75.8264	19.2682	90.9917	99.9373	29.9116	33.8001
34	FA-34	33.8106	29.2743	35.431	44.6782	27.7105	32.329		57.6299	25.9847	74.9189	142.627	32.4168	38.9002
35	FA-35	67.5035	44.6892	75.8268	81.466	55.7876	57.0967		99.4912	34.727	119.389	142.877	52.2329	56.9339
36	FA-36	49.4801	42.281	46.7029	61.5849	43.6995	50.3298		115.327	23.0587	114.173	102.727	36.4432	35.3499
37	FA-37	47.975	41.1486	35.5128	48.4066	45.1285	52.5589		115.389	86.6891	113.081	97.6986	166.16	114.651
38	FA-38	47.117	39.4133	39.6948	47.6261	40.462	46.0116		186.468	55.8843	167.821	174.359	67.1285	75.184
39	FA-39	47.2734	38.7156	38.202	47.5264	40.0753	44.8078		120.024	67.1259	102.021	152.831	87.3777	97.8631
40	FA-40	46.9764	30.2463	47.4873	66.0386	33.7755	38.1108		371.026	107.596	482.334	289.396	150.636	170.219
41	FA-41	46.8097	30.4087	48.8345	69.176	37.6502	33.6342		126.906	31.924	215.741	325.625	39.0237	43.7065
42	FA-42	47.506	39.6618	44.6099	70.5904	41.7903	45.919		57.6002	14.58	80.6403	114.308	16.1281	18.5473
43	FA-43	46.1018	41.7319	48.9632	68.8142	43.6995	47.8183		78.3578	16.5915	125.372	151.693	18.5943	20.2678
44	FA-44	46.0091	50.7401	45.0644	60.2535	50.3957	54.6205		110.649	32.6944	104.01	164.64	38.4174	46.1009
45	FA-45	46.0875	37.0276	45.5158	57.1968	40.4808	40.5815		233.621	107.673	228.948	224.802	120.684	132.752
46	FA-46	46.5331	32.3003	44.8685	60.3733	37.4074	37.9088		178.111	119.735	213.734	205.014	183.775	200.315
47	FA-47	45.1028	30.2845	45.0866	58.4107	35.4467	39.0617		126.524	98.8823	141.706	127.786	121.782	109.603
48	FA-48	45.3667	49.1495	44.4848	56.6904	50.5371	58.2055		94.8202	65.191	113.784	103.172	73.5387	72.068
49	FA-49	43.7688	32.2921	42.949	46.3258	32.6592	36.6788		382.263	173.927	535.168	642.897	199.799	223.775
50	FA-50	42.123	35.9158	46.1905	49.1968	37.8745	41.2812		366.321	274.018	492.701	593.645	425.738	510.886
51	FA-51	44.5077	34.4765	47.806	62.7546	37.8744	40.7956		186.149	64.4577	182.426	224.559	86.95	99.9925
52	FA-52	29.2846	21.4821	36.8459	42.4682	23.5934	27.9105		40.159	14.9969	39.3558	55.6103	18.2764	19.9212
53	FA-53	36.9465	30.3378	45.9076	58.8223	33.8001	33.4974		39.1476	31.2853	37.5817	46.5525	39.1476	50.8918
54	FA-54	33.979	28.8177	39.0195	47.079	28.2474	27.0324		6.88467	2.1071	6.67813	7.22173	2.89156	3.46987
55	FA-55	31.3008	22.8893	38.0654	57.2004	24.0089	27.3948		37.3472	20.9226	36.9737	33.2894	33.4631	32.7938
56	FA-56	34.2515	20.2807	39.9666	48.3553	20.4619	26.061		26.4682	7.60778	29.115	26.26	9.9785	9.08044
57	FA-57	70.5264	40.341	80.2042	89.9292	48.6251	53.2145		20.1057	4.62764	26.1374	23.3418	6.28303	6.09453
58	FA-58	46.3271	20.2611	35.2954	40.462	20.2814	23.9321		50.855	12.701	68.1456	47.654	17.0364	11.9255
59	FA-59	46.153	38.5047	51.6947	46.5195	43.8008	44.8078		12.083	2.54677	14.4754	12.9305	3.90764	4.68917
60	FA-60	45.3194	35.1474	42.0425	52.73	33.6746	41.5388		31.8598	9.01404	29.9482	36.3137	14.184	15.6024
61	FA-61	18.0789	14.8034	26.1041	29.317	14.5581	18.9757		57.4291	26.6786	45.9433	57.0689	38.3052	53.6273
62	FA-62	20.1384	11.1566	22.6574	31.2169	10.1707	13.4937		39.4743	27.9064	30.7899	31.8382	39.4071	43.3479
63	FA-63	20.1762	15.7087	18.7252	24.7527	14.5665	20.1922		44.2018	11.0766	58.3464	65.6783	14.1446	14.4275
64	FA-64	22.2319	13.4803	26.3546	32.6918	12.3726	16.7986		44.662	9.37988	42.4289	46.2517	12.3803	13.3707
65	FA-65	41.3591	30.4534	50.2486	60.9227	33.6333	35.8487		86.6008	24.282	98.7249	109.737	32.4926	29.8932
66	FA-66	19.6852	14.5626	24.0691	29.7855	18.9544	19.857		140.824	48.7952	211.236	165.001	67.2408	69.9304
67	FA-67	27.2616	26.2933	32.133	33.6392	22.3927	29.0201		99.6122	66.9562	129.496	127.317	86.7623	43.3811
68	FA-68	27.2247	23.5028	28.2443	31.1696	30.3626	27.8529		92.3992	62.5737	113.651	102.978	75.4123	73.1499
69	FA-69	37.7175	28.2761	42.2078	52.8603	31.5554	34.6707		88.8374	25.7967	106.605	95.0029	28.0815	30.6088
70	FA-70	33.18	22.6391	47.7631	57.7782	22.5185	27.9714		35.6458	9.03941	35.2894	27.7789	13.6078	15.1047
71	FA-71	24.5567	21.5836	32.9873	37.0682	28.0789	29.19		43.3001	10.544	30.3101	33.7407	14.8519	16.3371
72	FA-72	25.8533	20.2025	37.1754	42.4779	29.0215	29.9253		33.902	11.8763	26.4436	25.9642	14.2388	15.5203
73	FA-73	13.5922	9.73097	16.106	21.6355	12.3475	13.6588		36.9333	6.92435	29.5466	27.3096	11.8186	12.055
74	FA-74	28.6419	22.6814	32.0262	38.2421	27.7482	28.1519		32.7631	26.1855	6.55262	5.10617	34.0736	35.0958
75	FA-75	26.039	27.2674	37.3562	47.023	30.0061	33.7317		37.1351	11.1323	23.3951	22.4428	15.5967	15.7527
76	FA-76	35.1095	26.7203	40.7923	56.2588	22.4834	38.1108		38.4738	21.5472	34.2417	33.5598	25.8544	26.63
77	FA-77	9.57112	7.97056	15.8027	29.9194	9.83925	12.4497		37.9614	11.0628	56.9422	65.2326	14.7518	16.0795
78	FA-78	24.0544	18.9662	37.4398	44.672	14.6014	19.0322		37.0474	9.37859	44.4569	50.4193	11.2068	10.0862
79	FA-79	35.5605	34.9582	48.7623	67.006	39.0784	43.6995		33.5532	8.46089	40.2638	39.8	9.64655	11.0935
80	FA-80	43.9033	42.6361	58.2414	70.3125	44.5614	49.1886		42.8715	9.51626	55.733	56.5538	9.36314	10.4867
81	FA-81	28.1517	23.84	37.52	37.0571	29.1019	27.7928		41.7396	11.724	37.1482	36.893	14.0245	15.8477
82	FA-82	29.668	25.1288	36.7251	45.7313	29.8858	28.9832		43.6252	20.2753	65.4378	79.3382	24.0811	27.4525
83	FA-83	30.9615	27.0066	43.1583	58.0402	31.3297	28.518		37.8165	25.5219	45.3798	54.8531	29.1376	32.3428
84	FA-84	28.1699	26.4393	43.6169	50.5371	30.06	33.7923		29.9591	23.9255	35.951	47.8511	39.7258	43.3011
85	FA-85	23.711	18.4404	29.8451	32.3577	21.4043	23.5146		36.7793	25.4478	47.813	62.3287	32.991	35.6303
86	FA-86	38.1861	29.055	49.1564	65.6291	32.3637	39.8785		39.5478	18.0353	47.4574	59.5226	24.2655	26.9348
87	FA-87	36.5632	23.5562	48.773	63.8627	22.6642	28.0029		43.7167	32.5489	43.2796	53.201	44.2938	48.7675
88	FA-88	38.7337	35.8132	52.9895	60.0377	22.3886	44.6769		34.6371	8.67666	33.9444	33.3322	12.556	13.9246
89	FA-89	39.1968	32.6381	54.6246	67.0957	23.7105	40.1565		38.1386	7.97174	34.3248	33.823	10.0915	11.1914
90	FA-90	30.4048	22.3959	39.9915	42.8267	22.1727	28.1461		36.833	10.2302	31.308	30.7454	14.4385	16.1712
91	FA-91	21.8185	15.9955	30.6781	33.3457	14.6721	20.3152		32.9353	15.1403	42.8159	51.3455	18.1803	22.18
92	FA-92	34.1255	32.692	42.9799	39.4987	40.6185	40.5167		35.6302	5.89768	60.5714	84.0508	8.62786	9.57693
93	FA-93	34.7084	28.7209	45.4341	47.6417	28.8473	38.6816		39.2279	28.1203	54.9191	70.6614	39.1652	38.3819
94	FA-94	26.0044	15.5242	35.2551	40.1593	14.6309	15.9426		33.6006	9.73487	53.761	64.4516	18.5139	16.6625
95	FA-95	35.5189	28.5159	48.6337	60.5156	19.0307	22.5549		39.9746	10.2168	37.5761	33.9625	11.1909	8.72888
96	FA-96	28.7801	14.7739	40.1131	42.6478	13.3085	15.7283		34.6728	15.7678	33.9793	51.5082	14.0425	15.4467
97	FA-97	40.4818	12.7854	56.244	60.6419	18.9757	18.6745		38.2526	13.5312	45.9031	55.6714	14.7273	16.7891
98	FA-98	27.8118	22.609	36.6342	35.8491	25.7791	27.6924		37.7624	7.9609	42.2938	49.485	7.9301	8.5645
99	FA-99	22.7159	15.5286	25.8577	29.0326	15.4706	18.2554		35.8035	28.75	42.9642	47.0063	43.2506	45.4131
100	FA-100	24.0098	18.4123	31.2832	35.8101	19.0115	22.6328		33.7983	10.1419	47.3176	50.6417	15.919	16.0782
101	FA-101	35.5091	30.0219	47.7912	47.127	23.7649	40.3801		35.9796	20.1578	48.3926	56.6452	26.1932	29.4149
102	FA-102	36.9249	30.2505	44.9487	54.9578	33.5964	38.0091		38.8616	11.2937	38.0843	45.7978	17.4683	19.1802
103	FA-103	24.563	20.6152	23.276	39.0617	22.3927	25.7064		36.5011	9.13856	35.771	46.5701	11.4066	12.8894
104	FA-104	29.6988	26.8186	37.8672	45.9979	30.06	31.674		36.1729	9.00483	34.726	42.5316	13.5648	16.2778
105	FA-105	32.6084	25.7752	31.0526	28.9425	25.7267	30.3575		36.9117	7.76609	35.8044	35.1545	12.2473	13.3496
106	FA-106	32.3198	26.6666	41.6639	55.3369	28.0724	32.7174		42.3913	11.8283	41.9674	43.9126	21.3652	20.7243
107	FA-107	31.5686	23.4603	46.0774	56.1579	35.9572	29.19		31.3817	7.78751	34.5199	41.118	9.41452	6.49602
108	FA-108	35.0442	29.0504	48.1815	59.1477	35.348	32.6367		39.8971	8.38671	51.8662	57.1095	10.8919	12.1989
109	FA-109	26.1836	21.8259	38.6079	46.1204	25.7791	25.3098		42.5959	12.1364	57.0786	110.355	16.6976	18.7013
110	FA-110	27.6778	22.5157	35.8634	42.494	28.4298	29.0326		44.3726	10.9709	53.1584	64.1131	13.4263	15.1717
111	FA-111	39.0655	35.6625	49.3492	61.0639	33.3959	42.5496		39.4313	26.4588	37.0655	33.4091	29.5893	33.14
112	FA-112	30.424	24.8761	35.6287	49.1886	27.9641	29.0806		44.662	35.1637	35.7296	33.1801	39.3651	45.2699
113	FA-113	6.89048	8.72304	11.1168	13.171	10.9761	9.86846		37.7922	11.0394	29.4779	30.8799	13.5901	14.8132
114	FA-114	33.1599	27.9809	44.2667	49.9434	28.9832	32.5936		37.1065	9.86825	48.9806	76.7746	10.6052	12.7262
115	FA-115	31.2553	23.7507	28.6181	42.4758	25.5056	24.6018		38.2583	17.402	42.4668	25.7549	26.513	29.1643
116	FA-116	25.8461	31.6627	40.2348	41.2084	33.6501	33.6501		34.6855	12.4579	37.8072	58.1962	14.9807	16.3289
117	FA-117	27.2224	24.7146	39.6132	48.5826	27.1699	19.0896		36.0885	7.20858	35.7276	49.9555	8.11269	7.30142
118	FA-118	38.6758	29.4741	49.1397	55.8726	35.7745	31.6544		38.7892	31.0635	37.6255	45.1974	35.6861	34.9724
119	FA-119	8.9391	8.26406	14.2815	17.9786	10.7064	11.0094		47.6736	14.2706	38.1389	57.0825	22.3112	24.9886
120	FA-120	31.2037	24.6029	46.8761	57.3047	28.1461	22.8814		43.0292	23.8999	40.8777	39.7337	32.5301	39.0361
121	FA-121	37.5994	32.7155	46.8478	58.3659	38.8862	39.9123		37.8602	10.772	43.1606	40.4817	13.5047	15.5304
122	FA-122	30.3994	24.7325	47.3777	50.6967	29.4204	36.241		36.6482	9.04849	54.9724	48.8618	11.4526	12.4833
123	FA-123	32.3712	23.5144	32.1032	38.9001	31.1419	31.2512		49.3136	11.3377	64.1076	53.6499	17.2597	22.4377
124	FA-124	26.5956	25.7546	39.0894	47.0207	34.8114	31.7844		44.9522	9.412	55.2911	66.1529	15.1039	18.1247
125	FA-125	38.1383	31.2501	49.5399	54.9776	32.7248	38.1621		36.7524	10.2693	44.1029	52.8136	13.3779	13.1103
126	FA-126	30.0255	26.6171	39.8749	44.8659	30.045	35.8927		36.7396	16.8365	36.3722	44.5691	21.1253	19.224
127	FA-127	4.59577	6.66997	9.91556	14.4577	7.93164	8.93565		43.353	29.6871	41.1853	58.9311	38.9223	37.7546
128	FA-128	25.5266	23.5875	43.8043	45.919	22.456	29.1022		33.7948	26.3866	38.5261	47.8206	40.5943	28.416
129	FA-129	21.3499	14.5812	35.7633	32.6491	14.5665	18.7858		33.2518	22.9669	49.8777	52.9238	36.4806	43.7767
130	FA-130	23.8899	16.6354	42.1473	35.8101	16.7986	15.6921		36.2125	16.4963	47.0762	42.4657	23.8649	26.2514
131	FA-131	30.3723	22.5287	42.9983	48.8388	22.5565	23.5635		37.2484	27.8401	45.8156	41.8275	41.3476	57.8867
132	FA-132	25.033	24.9798	35.0005	43.2241	27.88	28.9932		37.1165	9.43369	44.5399	43.9233	11.8773	13.065
133	FA-133	25.9095	21.6763	40.4675	39.9654	23.4972	25.3569		36.6316	7.75969	36.2653	25.607	10.1543	10.3574
134	FA-134	24.9171	23.8839	26.5059	31.2687	26.5059	27.4895		36.7149	10.5395	25.7004	23.4504	13.7754	14.8774
135	FA-135	26.9359	18.4633	35.8562	44.8455	15.7565	21.8107		32.6746	15.0138	25.4862	30.5499	20.7418	19.0825
136	FA-136	43.1806	30.3885	50.2451	60.2941	39.0907	43.7132		44.3765	29.7719	35.5012	43.7246	38.6519	40.198
137	FA-137	28.2752	29.0771	34.8462	52.6974	34.8462	34.4442		42.7951	33.2511	8.55902	8.35542	40.0562	20.0281
138	FA-138	37.7122	30.2536	46.1678	62.938	23.7926	35.9602		43.9201	12.6444	5.70962	6.36536	13.8832	13.4667
139	FA-139	29.5467	25.7532	34.8847	48.1142	22.0595	30.5755		38.1988	9.53175	33.9969	36.333	14.5824	15.8948
140	FA-140	27.9276	22.636	31.3546	43.0617	24.025	27.0281		33.8996	15.0756	50.8494	55.7796	21.3568	23.706
141	FA-141	31.1147	23.7908	39.9928	50.0937	24.3672	30.4295		44.4729	14.3602	53.3675	38.4032	18.6786	20.5465
142	FA-142	26.7857	20.3675	29.1609	38.1412	21.5932	23.9321		42.8029	8.59689	51.3635	50.5497	13.6969	14.9297
143	FA-143	23.2029	22.4762	29.0999	45.1541	23.5618	25.777		42.4616	34.0026	55.2001	50.2813	44.1601	45.0433
144	FA-144	23.5928	18.9019	29.1376	39.2199	18.4505	22.4834		34.8341	10.7059	48.7677	44.4652	14.6303	15.0692
145	FA-145	24.4912	12.8303	37.4494	44.5316	12.5501	15.6625		28.564	4.55548	45.7023	36.9111	5.34717	5.40064
146	FA-146	27.0489	18.4645	35.547	43.5868	19.9385	22.6574		37.1582	10.7972	34.9287	39.1976	14.4397	14.8729
147	FA-147	26.7227	19.5166	37.5716	45.2606	21.3977	26.8225		40.1835	10.0601	39.3798	38.6863	12.1555	13.2495
148	FA-148	26.8802	21.4707	36.6148	44.5252	23.6387	25.2823		35.7095	8.94612	42.8514	42.3402	10.2665	9.23983
149	FA-149	22.7305	23.6486	40.9843	47.7855	24.6712	29.1019		35.8487	7.55541	40.1506	31.4305	7.82936	9.00376
150	FA-150	35.9893	33.1099	51.3474	62.1223	35.7025	38.4604		32.9947	9.38487	39.5937	38.612	11.0862	12.4166
151	FA-151	29.1	29.3026	40.0658	48.7457	31.5305	32.8359		41.3712	12.1145	57.9197	57.3139	14.3972	16.2688
152	FA-152	44.8865	31.6635	38.7235	45.1884	33.5466	36.8598		38.7235	9.93468	52.0831	52.3796	11.133	12.6916
153	FA-153	42.3753	40.0773	39.1893	50.3098	42.7244	46.0575		47.0676	11.7312	46.1262	45.0665	20.0037	22.2041
154	FA-154	44.7828	24.6468	40.4975	37.1814	27.9363	29.0417		36.8799	7.75319	36.1423	35.4579	10.0682	10.9744
155	FA-155	31.075	23.6972	29.19	34.9472	26.9679	28.1799		43.8354	12.254	42.082	41.1733	16.5698	17.8954
156	FA-156	36.9042	22.5972	41.308	46.4715	25.9188	28.2474		35.1321	8.71248	34.0781	33.1283	11.9449	13.2588
157	FA-157	34.2453	28.0059	39.9123	51.0959	30.8833	34.2691		41.6565	8.58914	41.2399	39.6818	12.6844	13.9655
158	FA-158	29.5114	25.7125	35.3248	44.1855	29.4204	31.7618		41.3311	11.4179	45.4642	43.9591	14.5816	16.171
159	FA-159	34.8805	28.7792	47.6417	57.4476	34.3108	38.9001		41.3041	17.497	53.6953	48.459	26.5998	29.4992
160	FA-160	38.6364	33.7072	35.1141	46.621	35.9214	39.2512		35.7498	23.8849	47.9048	57.3237	28.7429	32.192
161	FA-161	40.5713	34.6341	41.3842	53.5618	37.4573	41.3842		36.249	28.1891	43.4263	51.9547	40.9976	50.0171
162	FA-162	30.0797	26.6351	42.2445	51.2923	30.045	32.7672		41.8412	12.0964	39.3308	50.9716	15.5315	17.2399
163	FA-163	29.7494	26.2224	34.2366	46.1842	29.0158	33.6342		30.7226	11.1114	24.5781	32.5977	20.6932	20.2793
164	FA-164	28.0824	24.6976	40.2798	48.2089	27.6924	29.1022		38.9708	17.5554	30.3972	38.0368	19.2905	17.3615
165	FA-165	26.3098	23.7458	38.3752	42.494	25.7174	25.7174		41.8913	14.6852	55.2965	68.1223	13.1958	10.2927
166	FA-166	32.1892	28.9386	35.8101	41.1414	33.5971	35.9107		42.9017	8.60091	47.6209	46.7803	9.43837	10.3822
167	FA-167	34.1297	25.2233	52.2626	62.9366	27.6921	29.7061		38.7085	31.0267	42.1923	41.8511	32.5152	37.0673
168	FA-168	34.3202	23.8607	43.1238	49.9434	24.5705	27.6915		42.7628	13.0439	42.3351	42.6143	19.3715	20.9212
169	FA-169	40.2839	32.8303	50.4086	60.0826	35.7479	38.3909		37.7964	21.3583	36.6625	44.3948	33.2306	34.8921
170	FA-170	28.4349	24.8799	38.62	47.3834	26.5059	28.5891		36.4457	10.8536	29.521	42.4413	13.74	13.8774
171	FA-171	28.1488	23.739	37.5732	46.0312	22.6247	21.7157		38.0278	9.50823	36.5066	51.1162	14.7358	16.5483
172	FA-172	36.2468	30.1951	35.9755	44.4809	34.6691	33.5637		33.212	8.37206	40.8508	49.4286	10.3788	11.3959
173	FA-173	38.5291	31.5582	46.3605	58.5819	33.7351	32.8261		36.7652	7.73177	57.7214	52.0238	11.581	13.0866
174	FA-174	40.3403	34.4951	50.9263	60.5446	37.157	39.3844		38.5744	11.0178	53.2327	53.2158	17.0653	20.4784
175	FA-175	40.1025	35.6717	51.0959	57.252	36.5264	41.1435		48.1204	21.7396	64.4814	75.994	39.8437	43.4296
176	FA-176	47.0831	37.8017	55.4814	66.6794	44.2833	33.0852		42.1455	11.238	50.5746	57.4384	13.6551	13.2455
177	FA-177	35.1037	29.0929	48.6251	64.36	36.4962	46.2212		40.2114	28.8956	39.8092	44.0103	40.7743	28.1343
178	FA-178	46.3388	37.8252	59.4317	66.394	46.0116	46.0116		35.1141	24.1558	24.5799	26.9565	33.9203	37.9907
179	FA-179	25.367	20.1854	35.8462	50.2451	25.5757	23.882		46.0161	20.8589	35.8925	42.957	25.7246	28.8115
180	FA-180	35.748	29.0243	40.2281	59.3843	21.6768	25.8105		44.9667	33.3699	35.9734	44.4334	37.5202	42.3979
181	FA-181	36.9821	41.1166	44.5778	53.0155	30.2206	47.5075		34.8892	8.90775	6.97784	7.05493	9.85619	11.0389
182	FA-182	30.4082	29.1605	39.3736	48.4707	33.6337	34.3406		37.1078	7.80825	4.82402	4.59199	9.66287	11.1123
183	FA-183	24.0521	23.4989	24.6124	24.0096	26.8225	22.6032		44.2922	16.825	39.4201	35.8594	18.9013	20.6024
184	FA-184	41.072	35.8871	51.1493	60.0929	23.5146	35.7744		35.9753	16.6008	53.963	53.5376	25.4849	30.5819
185	FA-185	12.1311	11.3255	12.8252	16.4363	12.4244	13.2421		34.568	23.3739	41.4816	33.491	28.5801	31.4382
186	FA-186	25.8413	21.2948	29.1109	26.089	28.0029	29.1109		32.5357	25.6699	39.0429	40.282	28.5247	31.0919
187	FA-187	34.9391	29.1105	47.99	58.1302	33.5328	35.7415		36.9162	10.8158	47.991	51.8786	12.3115	11.0804
188	FA-188	22.3576	16.3496	32.6902	40.2574	19.0693	12.612		37.735	10.1052	45.282	50.0299	14.9816	14.6819
189	FA-189	10.586	7.85963	14.4184	12.8624	10.8916	12.8624		37.1558	16.2422	36.7843	39.3062	22.5722	25.2808
