# Supplementary material for: Microsatellite markers-aided dissection of iron, zinc and cadmium accumulation potential in Triticum aestivum
Source: PeerJ. 2023 Apr 17;11:e15229. doi: 10.7717/peerj.15229 (PMC10117381; doi:10.7717/peerj.15229)
Supplement: Supplemental Information 7 [file peerj-11-15229-s007.xlsx]

## Sheet: control
line #	Plant height (cm)	spike height (cm)	no. of grainin spike	Days to 50% heading	no. of tillers	1000 grain weight (g)
	average	average	average	average	average	average
FA-1	77	4.5	38	98	4	33
FA-2	83.5	5	38	99.5	6	30
FA-3	84	6	40	98.5	5.5	39
FA-4	98.5	4	38	100	6.5	44.5
FA-5	87	4.25	34	98	4.5	41.5
FA-6	72.5	6	38	99	6	39
FA-7	82	6	30	102	5.5	32
FA-8	69	4.5	34	101	4.5	39
FA-9	77.5	6	38	99	5.5	42.5
FA-10	92.5	6.5	28	102.5	3.5	36.5
FA-11	88	6	38	100.5	4.5	33.5
FA-12	79.5	5.5	30	98.5	4	43
FA-13	70.5	6.5	48	101	4.5	44.5
FA-14	67	4	38	99.5	4.5	34.5
FA-15	69.5	8	32	98.5	3.5	44
FA-16	71.5	8.5	40	98.5	5	43
FA-17	93.5	5	38	99	4.5	43.5
FA-18	87.5	7	36	98	3.5	37
FA-19	91.5	7.5	40	98.5	5	35
FA-20	75.5	9	42	101	3	31
FA-21	81	4.5	36	102	4.5	39.5
FA-22	91.5	7.5	36	101.5	4	39.5
FA-23	90.5	8	36	100.5	3.5	35
FA-24	85	5.5	32	98.5	3	40
FA-25	90	6	42	99	4.5	41.5
FA-26	79.5	4.5	32	99	3.5	40
FA-27	92	6	44	100	6	35
FA-28	73.5	6.5	34	103	5	36.5
FA-29	71	6	38	101	6	42
FA-30	73	6	30	102	3	50.5
FA-31	66.5	9	40	98.5	5.5	42
FA-32	72.5	7	36	98.5	4.5	31
FA-33	83	7	44	105.5	6	37.5
FA-34	78	8.5	38	101	5.5	40
FA-35	79	8.5	72	107	4	26.5
FA-36	85	11	52	100.5	3.5	47.5
FA-37	60	12.1	6.5	99	5.5	26.2
FA-38	81	5.45	48	98	3.5	34.5
FA-39	99.4	9.5	46	99	6	33
FA-40	89	11	42	99	4	31.4
FA-41	82.5	12.25	40	98.5	4.5	36
FA-42	82	6	32	99	4	39
FA-43	83.5	8	32	98.5	3.5	44
FA-44	83.5	7	42	98	4.5	46.5
FA-45	76.5	5.5	40	107	5.5	32
FA-46	92	10.5	56	98.5	5	50.15
FA-47	82.5	6.5	42	99.5	5	42
FA-48	82.5	7.5	34	98.5	3	38
FA-49	88.5	5	38	99	4.5	45
FA-50	87.5	7	50	99	4	40
FA-51	92	7.5	40	100	5.5	42.5
FA-52	83	6	40	98	5.5	43.5
FA-53	87.5	12	32	98	3.5	45
FA-54	77	6.5	42	98	5	37.5
FA-55	83	7	38	98.5	6	35
FA-56	86	10	40	100.5	5.5	40.5
FA-57	75.5	5.5	40	99	4.5	43
FA-58	78	7	42	99.5	4	47
FA-59	80.5	4.5	42	99.5	3	48.5
FA-60	76	9.5	48	99	5	37.5
FA-61	88	6.5	34	103	4	43.5
FA-62	87	7	40	98.5	5.5	43
FA-63	87	7.5	38	98.5	4.5	44
FA-64	78	6.5	40	99	5	34.5
FA-65	77.5	6.5	42	100.5	5	46.5
FA-66	72.5	8.5	34	98.5	6	48.5
FA-67	67.5	8	38	99	5	39
FA-68	68	6	34	98.5	4.5	37
FA-69	73	4.5	36	100.5	4	37
FA-70	98.5	6	44	98.5	4.5	35
FA-71	93	6.5	38	100	5	41.5
FA-72	83	6	34	100.5	5	38
FA-73	87.5	5.5	32	99	5.5	35
FA-74	86.5	6.5	40	99	4	42.5
FA-75	72	5.5	40	98.5	6	37
FA-76	78.5	6.5	38	102.5	5	36.5
FA-77	88	6	38	98	3.5	42
FA-78	81.5	6	38	99	4.5	32.5
FA-79	90.5	7.5	36	101.5	4	41.5
FA-80	75.5	6	40	101	4	48.5
FA-81	81	6.5	40	98.5	4	46.5
FA-82	80.5	6.5	36	99	4.5	37
FA-83	78.5	6	40	99	4	41
FA-84	75	8.5	36	101.5	4	36
FA-85	81	7	32	98	5	37.5
FA-86	73.5	6.5	42	102	4	32.5
FA-87	75.5	8	32	99	4.5	43
FA-88	75.5	6.5	40	100.5	5	41
FA-89	72.5	8.5	34	98.5	5	38.5
FA-90	77	8.5	38	98.5	4.5	35
FA-91	73.5	7.5	30	98.5	4.5	37
FA-92	97	8.5	40	99	4	44
FA-93	78.5	8	36	101	6	43.5
FA-94	82.5	9	44	98.5	4	49
FA-95	86	6	38	98	4	39
FA-96	86.5	7	36	98	5	42
FA-97	77.5	8	42	98	6	39
FA-98	67	7.5	36	98.5	6	37
FA-99	68	9.5	30	99	4	44.5
FA-100	71.5	9.5	34	98	4	42.5
FA-101	69	8	30	98	4	35.5
FA-102	92.5	7.5	36	99	4	43.5
FA-103	82	6	36	102.5	6	42
FA-104	86	8.5	38	101	5	39
FA-105	70.5	8	36	101	4.5	33
FA-106	80.5	9	38	98.5	6.5	38.5
FA-107	95	9.5	40	98.5	3.5	34.5
FA-108	80.5	10	36	98.5	3	40.5
FA-109	88	8.5	36	99	4	33.5
FA-110	80.5	8.5	40	103	5	32.5
FA-111	92.5	8.5	40	98.5	4	32
FA-112	88.5	6.5	38	98	4	39
FA-113	88	6	40	98.5	4.5	46
FA-114	77.5	8	38	101	5.5	46
FA-115	72.5	7.5	36	99	3.5	33
FA-116	67	9.5	36	99	5	43.5
FA-117	67.5	8.5	40	99	3.5	39
FA-118	87	6	40	99	4	48.5
FA-119	83	6.5	34	99	3.5	44.5
FA-120	77.5	7	42	98.5	5	37.5
FA-121	91.5	8.5	34	101	5	33
FA-122	82.5	9.5	40	100	4.5	39.5
FA-123	74.5	8	38	100.5	5	45
FA-124	64.5	8	34	99.5	5.5	49
FA-125	84	8	40	98.5	5	47.5
FA-126	85.5	9.5	40	99	5	48.5
FA-127	84	9	32	99	4	37
FA-128	88	9	38	98	3	38.5
FA-129	76.5	7.5	40	98	4	34.5
FA-130	70.5	6	36	101.5	4	44
FA-131	70.5	8.5	38	102.5	5	36
FA-132	63.5	8	34	101	4.5	37
FA-133	91	8.5	34	98.5	5	41.5
FA-134	75.5	7	42	101.5	5	38
FA-135	72	7	32	98.5	4	41.5
FA-136	74.5	4	40	101.5	5	40.5
FA-137	69	4.75	36	102	5.5	41
FA-138	83	6.5	34	109	4	38.5
FA-139	92	6	34	99	4	45
FA-140	75.5	5	40	99	4	47.5
FA-141	73	4.5	38	98.5	5	40
FA-142	77	8.5	44	98	5	47
FA-143	72	7	34	98	3.5	36.5
FA-144	63.5	8.5	38	98.5	6	39
FA-145	68.5	5	38	100.5	3	43
FA-146	77	6.5	40	100	5	46.5
FA-147	71.5	4.75	36	99.5	4	34
FA-148	73	8.5	34	99	4	41
FA-149	73.5	9.5	42	99	3.5	36
FA-150	90.5	8	38	98.5	4.5	36
FA-151	75.5	5	34	99	5	47
FA-152	70	8.5	32	100.5	5.5	41.5
FA-153	73	6.5	42	98.5	4	38
FA-154	72	6	40	99	5	40.5
FA-155	73	4	32	98.5	4	40.5
FA-156	79.5	4.5	34	99	4.5	28
FA-157	77.5	8	38	99	4	40.5
FA-158	81.5	8	32	101	3.5	37.5
FA-159	86.5	5	38	100.5	3.5	32
FA-160	74.5	5.5	34	109	4	39
FA-161	66.5	8	38	99	4.5	36
FA-162	64.5	7.5	36	99	5	39
FA-163	85.5	8	38	98.5	4.5	43.5
FA-164	88.5	9.5	34	98.5	3.5	42
FA-165	72	8.5	38	98.5	5.5	42
FA-166	72	6	36	98.5	4.5	36
FA-167	80.5	8	42	99.5	3.5	36
FA-168	80.5	8	40	99	4.5	36.5
FA-169	69.5	6	34	99.5	3.5	38
FA-170	76.5	8	34	101.5	3.5	41.5
FA-171	74.5	5	38	100.5	5	35.5
FA-172	94.5	8	38	98	6	41.5
FA-173	71	8	36	98.5	6	41.5
FA-174	72.5	7	32	98.5	6	38
FA-175	76	8.5	40	98.5	5	36
FA-176	74	6.5	30	99	4	35.5
FA-177	77	6	42	98	4	36.5
FA-178	75	8.5	38	98.5	4.5	38
FA-179	75.5	6	40	99	5	42
FA-180	88.5	6	38	102.5	5.5	35.5
FA-181	83	6	34	100.5	5.5	31.5
FA-182	91	7	42	99.5	4	42.5
FA-183	80.5	7.5	36	100	5	34
FA-184	80	7	30	99	4	37
FA-185	80	7	38	98.5	6	41.5
FA-186	81	8.5	34	98.5	4	33
FA-187	78	6	38	98.5	3	35.5
FA-188	78.5	7.5	36	98.5	4.5	41
FA-189	65	6	32	98.5	4.5	42

## Sheet: Cd10
line #	Plant height (cm)	spike height (cm)	no. of grains/spike	Days to 50% heading	no. of tillers	1000 grain weight (g)
	average	average	average	average	average	average
FA-1	60	5.1	26	83.5	3.5	25
FA-2	61.5	5.4	26	85	3	30
FA-3	57	4.45	26	87.5	4.5	30
FA-4	62	5.5	26	86	3.5	25.5
FA-5	61	4	30	86	3.5	30
FA-6	60.5	5	30	85.5	4	24.5
FA-7	57	3	38	85	4	31
FA-8	67	5	30	86.5	4.5	24.5
FA-9	61	3.8	42	85.5	2.5	28.5
FA-10	67.5	4.15	28	84	2.5	26.5
FA-11	67	5	28	83.5	4	32.5
FA-12	66.5	3.55	34	83	3	30.5
FA-13	71.5	3.25	24	85.5	3	23
FA-14	73.5	3.25	26	85	3	39.5
FA-15	71.5	3.25	30	87	3.5	27.5
FA-16	72.5	3.5	34	83.5	3.5	32.5
FA-17	62.5	6	28	82.5	5	24
FA-18	60.5	3.9	30	82.5	3.5	27
FA-19	60.5	5.5	28	82	3.5	30
FA-20	51.5	3.2	28	82.5	3	23.5
FA-21	61	6.5	28	84	4	21
FA-22	66.5	3.25	30	86.5	4	25
FA-23	72	5	30	85	3	24
FA-24	71	3.7	26	85.5	3.5	26.5
FA-25	63	6.5	28	86.5	4	24.5
FA-26	61	6.5	28	88.5	3.5	23.5
FA-27	66	3.65	34	87	3	30.5
FA-28	59.5	3.9	42	84.5	4	24
FA-29	64	5	52	83.5	3.5	21
FA-30	61	3.25	32	85.5	5	24
FA-31	61	3.65	40	83.5	3.5	36
FA-32	62	4	42	85	5	24.5
FA-33	66.5	4.8	34	87.5	4.5	23.5
FA-34	70.5	4.25	44	85.5	3.5	21
FA-35	53	9.5	9	84.5	5	23.5
FA-36	59.5	7.45	26	80	4	22.5
FA-37	82.93	9	40	85	2	22.9
FA-38	66.5	2.95	76	92	1	39
FA-39	56.835	7.5	48	89.5	1	28
FA-40	60	6	48	84	4	43.35
FA-41	71.5	9	44	92.5	3.5	24
FA-42	62	3.5	42	91	3	22
FA-43	63	3.75	44	89.5	3	27.5
FA-44	62	3.5	42	81.5	3.5	22
FA-45	66	4	46	85	5	23.5
FA-46	61	10.55	28	92.5	1.5	24.5
FA-47	62.5	4	26	84	3	27
FA-48	65.5	3.25	32	84	4	33
FA-49	67	4.5	36	86	5	31.5
FA-50	66.5	3.8	34	87	3	33
FA-51	71	3.85	40	91	4.5	26.5
FA-52	62	4.5	24	91	3.5	23.5
FA-53	63.5	4	24	84.5	3	28.5
FA-54	66.5	3.25	40	86.5	4	26.5
FA-55	63	3.75	22	84.5	4	23.5
FA-56	75.5	4	42	85.5	4.5	24
FA-57	76.5	4	28	83.5	2.5	27
FA-58	75.5	4	30	84	2.5	24
FA-59	77	4.2	30	83	2.5	23
FA-60	77.5	4.5	24	85.5	4.5	22
FA-61	74	5	26	86.5	3	28
FA-62	73	3	26	85.5	3.5	23
FA-63	73.5	4.65	20	86.5	5	22
FA-64	72	4.5	28	87	5	23
FA-65	69.5	4.15	26	87.5	4.5	30.5
FA-66	70.5	3	22	87	4	26
FA-67	67.5	3	26	85	4	23
FA-68	62.5	4.5	26	84.5	4.5	32
FA-69	71.5	4.4	30	83.5	4	22
FA-70	71.5	4.6	24	86	3.5	24
FA-71	71.5	3.8	24	88.5	3	22
FA-72	72	3	32	85.5	2.5	28.5
FA-73	78	4.1	36	84	3	22
FA-74	75.5	4.5	20	83.5	3.5	28
FA-75	75.5	6.5	22	85	2.5	33
FA-76	49	4.25	28	86.5	4	23.5
FA-77	50.5	3.8	40	87	5	30.5
FA-78	61	4.5	26	85.5	4	23
FA-79	66	6.4	24	86.5	3	25.5
FA-80	56.5	3.4	34	87.5	4	27
FA-81	66	5	24	91.5	4	24
FA-82	63	4	28	91.5	3.5	24.5
FA-83	61	5	32	86	4	27
FA-84	56.5	3	40	84.5	4	26
FA-85	61.5	5	30	85	3	29.5
FA-86	54.5	3	40	84.5	3	27
FA-87	61	3.6	32	90.5	4	24.5
FA-88	71.5	4	32	83.5	4	22
FA-89	76	3.1	38	87	4.5	30.5
FA-90	77.5	4.5	36	86.5	4	24
FA-91	62.5	4.8	26	87	3	25
FA-92	62	4.85	26	86	3.5	27
FA-93	57.5	6.5	28	84.5	3	26
FA-94	60.5	4.25	28	84	4	21
FA-95	71.5	6	34	84	3	26
FA-96	62	5	22	85	2.5	25.5
FA-97	66.5	3	24	86	3	30
FA-98	56	3	24	87	4	26
FA-99	65.5	5	28	88	5	32
FA-100	65	4	32	84.5	3.5	23.5
FA-101	71	3.5	30	84.5	3.5	25
FA-102	71	3.45	28	93	3.5	23.5
FA-103	76.5	4.5	30	93.5	3	37.5
FA-104	50.5	3.35	30	91.5	4	23
FA-105	55	3.75	42	86.5	2.5	32.5
FA-106	51.5	4	18	85	4	33
FA-107	62	5.55	30	84	3.5	23
FA-108	61.5	3.95	34	88.5	3.5	22.5
FA-109	60.5	5	24	95	4	38
FA-110	72.5	3.15	30	94	3.5	33
FA-111	71	4.5	32	86.5	2	25
FA-112	72.5	6	16	85.5	3	25
FA-113	52	3	24	89	4.5	22
FA-114	51	5	26	87.5	3	24
FA-115	56	4	28	87.5	2	22
FA-116	56.5	5	18	90	2	33
FA-117	57	4.75	26	87.5	3	24.5
FA-118	62	4	26	87.5	3	25
FA-119	66	5	22	85.5	3.5	25
FA-120	60.5	3.2	32	85.5	3	28.5
FA-121	64.5	6.15	22	84.5	4.5	26
FA-122	62.5	3.6	24	86	3.5	27.5
FA-123	66	4	36	87	2.5	22
FA-124	64.5	3.6	48	86	3.5	24.5
FA-125	67	3	24	85	4	27
FA-126	66	4	30	87	3	22.5
FA-127	71.5	5.1	32	87.5	3	36
FA-128	68	5.4	20	87	2.5	22
FA-129	67.5	4.45	26	84	3	23
FA-130	66.5	5.5	24	86	3.5	31.5
FA-131	65.5	4	36	85	3.5	26
FA-132	62.5	5	28	89.5	3.5	24
FA-133	65.5	3	24	87	4	21
FA-134	63.5	5	24	86.5	3	22
FA-135	62	3.8	24	87	4.5	31
FA-136	56.5	4.15	20	85.5	3	21
FA-137	67	5	24	85.5	3	23.5
FA-138	61	3	24	85	3.5	26
FA-139	66.5	3.75	46	85.5	3.5	23
FA-140	67	4.15	26	86	3.5	22
FA-141	62	4.25	22	84	3.5	30.5
FA-142	62	6	20	86	5	26
FA-143	72	3	22	90.5	3	24.5
FA-144	67	4.15	22	91	3.5	26
FA-145	67.5	5	14	88	3.5	24
FA-146	62	5.8	16	87	4.5	23
FA-147	60	3	16	86	3.5	26
FA-148	61	3.75	34	86.5	4	22
FA-149	60.5	5.5	18	88.5	4	22.5
FA-150	67	4.7	18	90	3	21
FA-151	66.5	4.05	30	82.5	2	25
FA-152	57	3.8	42	83.5	3	22
FA-153	72.5	5	14	83.5	2.5	23.5
FA-154	65.5	4	18	86.5	3	21
FA-155	62	4	30	84	3.5	22.5
FA-156	67	5	20	84	4	25
FA-157	71.5	5	18	87	3	33
FA-158	67.5	8	14	85.5	3	23
FA-159	68	5	20	84.5	4.5	27.5
FA-160	71	4.5	24	86	2	36.5
FA-161	62.5	4.5	28	83	3	24
FA-162	65.5	4.5	28	85	4.5	23.5
FA-163	68.5	3.25	36	83.5	3.5	35
FA-164	65	4.5	32	85	3.5	25
FA-165	64.5	7	30	86	2.5	25
FA-166	55	3	28	82.5	4	24.5
FA-167	56.5	7	30	81	3.5	24
FA-168	56	3.05	30	88	3	30
FA-169	63	5	34	87.5	4.5	24
FA-170	61	8.5	28	88.5	3	23
FA-171	66	3.5	32	86	4.5	24
FA-172	67	7	28	88	3.5	25.5
FA-173	65.5	5.5	30	89	3.5	24.5
FA-174	66	3.5	24	91	3	22
FA-175	63	6	20	84.5	3.5	30.5
FA-176	66	3.2	28	86.5	3	24
FA-177	66	8.5	34	82.5	3.5	28.5
FA-178	65	3	32	81	3.5	27
FA-179	55	5	24	84	3.5	24
FA-180	61.5	3.2	36	88	3.5	24
FA-181	60	7	28	86	2.5	21.4
FA-182	68.5	5.5	20	88	4	24.5
FA-183	75	3.25	28	88.5	3	26
FA-184	70	3	24	89	4	26.5
FA-185	53	6	24	88	3.5	27
FA-186	52	3	18	87	4	24
FA-187	60.5	3.15	20	85.5	3	31.5
FA-188	56	3.5	20	85	4	24
FA-189	57	4.5	26	82.5	3	21

## Sheet: Zn5
line #	Plant height (cm)	spike height (cm)	no. of grainin spike	Days to 50% heading	no. of tillers	1000 grain weight (g)
	average	average	average	average	average	average
FA-1	80	8	40	98.5	8	44
FA-2	72	8	40	100.5	5.5	45
FA-3	72	7.5	40	99.5	7	46
FA-4	74.5	10	56	99	6.5	47.5
FA-5	64	7.5	44	100.5	5.5	49.5
FA-6	63.5	6.5	40	101	5	45
FA-7	72.5	7	44	99	6.5	38.5
FA-8	74	8	44	99	5	44
FA-9	76	8	40	99	6	40
FA-10	81	9	52	98	7	44.5
FA-11	76.5	9.5	50	98	6.5	46
FA-12	77	8.5	50	98.5	4	45.5
FA-13	72	7	44	98.5	6.5	39.5
FA-14	70.5	9	46	99.5	5	44
FA-15	63.5	9	54	97.5	8	41.5
FA-16	79.5	9	52	99	6	43
FA-17	77.5	7.5	52	97.5	7.5	44
FA-18	86.5	9.5	52	99	5	43.5
FA-19	82.5	10.5	50	99	7	44.5
FA-20	91.5	7.5	32	98	5	40
FA-21	81	8	48	99	6	48.5
FA-22	75	9	44	98	5.5	35
FA-23	71	6.5	50	97.5	7	47
FA-24	76	10.5	44	97.5	8	39.5
FA-25	77.5	11	44	98	3.5	48.5
FA-26	88	8.5	50	98	5.5	47
FA-27	81.5	10	48	98.5	3	42.5
FA-28	91	7	32	98.5	7	41.5
FA-29	76.5	7	32	99	8	40.5
FA-30	77	9.5	50	98.5	6.5	46.5
FA-31	81.5	6	36	98.5	6	46
FA-32	71	8	40	98.5	6	46
FA-33	75	9	48	99	6	43.5
FA-34	77	9	46	99	7.5	44.5
FA-35	94.5	8	52	98.5	7	41
FA-36	62.1	10	61	99	3.5	30.5
FA-37	91.5	3.85	52	101	6.5	27.15
FA-38	106.2	8.5	14	100.5	3	43
FA-39	70.5	10.5	50	100	8	35
FA-40	73	15.05	26	96	5	35
FA-41	84	9.5	50	102.5	3	53.05
FA-42	78	9	40	99	7	46
FA-43	79.5	8	24	97	6	37.5
FA-44	83	8	36	98.5	7	46
FA-45	66	8.5	56	98	5.5	47.5
FA-46	87	11	30	105.5	6	40.5
FA-47	76	10.5	54	98.5	6.5	44.5
FA-48	78	9	44	99	3	44
FA-49	77	10	40	99	5	44.5
FA-50	87.5	14	48	98.5	4	44
FA-51	80.5	10	44	97.5	3.5	47
FA-52	81	6	48	98	5	48
FA-53	83	8	32	99.5	4	49
FA-54	81.5	9	48	97.5	8	46
FA-55	75	10	44	98.5	7	44.5
FA-56	73	12	48	97	7.5	46.5
FA-57	68.5	10	48	97	6.5	41
FA-58	69	7	44	99	5	46
FA-59	76	9	48	99	3.5	40
FA-60	71	8	40	98.5	8	39
FA-61	68	5	36	98	3	40.5
FA-62	64.5	12.5	46	97.5	7	36.5
FA-63	68.5	9.5	46	98	4	39.5
FA-64	67	8	46	97.5	3	37.5
FA-65	64	6	50	98	6.5	42.5
FA-66	65.5	8.5	44	101	5	45.5
FA-67	73.5	9.5	52	98.5	4	46
FA-68	80.5	9	46	99.5	6	46
FA-69	80.5	7.5	48	101	7.5	45
FA-70	70	9.5	48	98.5	7.5	44
FA-71	66	12.5	52	98	2	45
FA-72	71	8	32	98	6	43.5
FA-73	74.5	9	44	98	5	49.5
FA-74	64.5	10	46	98	8	44.5
FA-75	71	9	44	97.5	7	46
FA-76	76	7	36	99.5	7.5	41.5
FA-77	79.5	6	36	99	9	47
FA-78	76.5	7	48	99.5	5	44
FA-79	78.5	10	60	100	5	42
FA-80	78	11	48	100	7.5	41.5
FA-81	75	9	54	99	6	40.5
FA-82	79.5	9	46	99	9	41
FA-83	75	8.5	40	98.5	5	43
FA-84	76	10	46	99	4.5	41
FA-85	76.5	7	48	99	8	40.5
FA-86	72	9	44	98.5	6	42
FA-87	73.5	10	50	98	3	45.5
FA-88	75.5	6	50	100.5	7.5	43
FA-89	75.5	11.5	44	100.5	7.5	45
FA-90	66	6	50	99	6	44
FA-91	74.5	9.5	46	99	7.5	47.5
FA-92	84	5	50	99	5.5	43
FA-93	75.5	12.5	52	98.5	8	45
FA-94	84	8	54	97.5	5	39
FA-95	89	8	44	98.5	7	53
FA-96	80	7	36	100.5	6	32.5
FA-97	77.5	10.5	52	101	8	40
FA-98	73.5	9.5	56	99	5	40.5
FA-99	85	10	48	99	7	39
FA-100	81	11.5	36	98.5	6.5	37.5
FA-101	93.5	10	44	99	6	33
FA-102	86	10	44	99	8	39.5
FA-103	93	8	52	98.5	7	34
FA-104	80.5	8	44	99	7	39.5
FA-105	71.5	6.5	46	100	7.5	42.5
FA-106	72.5	7.5	44	99	6	44.5
FA-107	75.5	7	48	99	8	44.5
FA-108	68.5	11	56	98.5	5	45
FA-109	64.5	10.5	58	99	7	46.5
FA-110	74	13.5	54	98.5	5.5	47
FA-111	81.5	8	48	99	8	47
FA-112	70	8.5	52	98	6	45.5
FA-113	72	9.5	60	98.5	7.5	46.5
FA-114	73	8	54	98.5	8	44.5
FA-115	69.5	9.5	56	98.5	5	44.5
FA-116	66.5	8	54	98	8	46
FA-117	66.5	13	46	99	8	39.5
FA-118	67.5	10.5	50	99	5.5	40.5
FA-119	81	11	54	99	7	45
FA-120	79.5	8.5	60	100	5	46.5
FA-121	74.5	10	50	98	8	44.5
FA-122	79	8	56	99.5	4.5	44
FA-123	67.5	8.5	50	98.5	7.5	49
FA-124	73	8.5	56	98.5	4.5	47
FA-125	70	9	58	99.5	7.5	49
FA-126	68.5	6	56	100	7	49.5
FA-127	71	7.5	32	99	3.5	50.5
FA-128	79.5	7	54	99	7.5	43.5
FA-129	76.5	8.5	48	98.5	5.5	45
FA-130	75.5	6	54	99	7	42
FA-131	80.5	7.5	52	99	5	42.5
FA-132	77	9	36	99	7.5	36
FA-133	70.5	7	50	98	4.5	36.5
FA-134	67.5	12.5	54	98	7	44.5
FA-135	67	10	40	98.5	5	40.5
FA-136	75	8	54	99	7	41
FA-137	80.5	7	46	101	6	42.5
FA-138	71.5	11.5	40	100	8	41.5
FA-139	65.5	9.5	52	98	5	39
FA-140	76.5	11.5	60	98.5	3.5	39
FA-141	70.5	13	64	98.5	8.5	43.5
FA-142	72.5	9.5	44	99	6.5	44.5
FA-143	81.5	10.5	54	99	7	39.5
FA-144	79.5	7	56	99	7.5	46
FA-145	70.5	13	70	98	4.5	46
FA-146	68	10.5	64	99	8	42.5
FA-147	84	9	48	97.5	6	40
FA-148	75	12.5	62	99.5	8	40.5
FA-149	80.5	9	54	98.5	7.5	35.5
FA-150	70	10	64	99	4.5	41
FA-151	73	7	42	98.5	5	40
FA-152	65.5	8	52	99	5.5	40
FA-153	72	11	54	98	7.5	45.5
FA-154	84.5	11	54	97.5	8	43
FA-155	81.5	8	46	98.5	8	46
FA-156	76.5	8	56	99	8	45
FA-157	72	7.5	52	99	7	41.5
FA-158	86	9	44	99	7	40
FA-159	72.5	8.5	64	99	5	45
FA-160	70.5	7	54	99	7	39.5
FA-161	65.5	7.5	52	98.5	6	39
FA-162	76	7	40	98	8.5	39.5
FA-163	76	8.5	48	99.5	7	42.5
FA-164	87.5	6.5	58	97.5	9	35.5
FA-165	81.5	11	52	99	6	42
FA-166	97.5	8	44	98.5	7.5	39.5
FA-167	76	6	42	98.5	8	33.5
FA-168	77	11.5	56	98.5	8.5	33.5
FA-169	72.5	9.5	50	98	6	34
FA-170	66.5	9	48	98	8.5	40.5
FA-171	81	9.5	48	97	6.5	42
FA-172	82.5	11	52	99	8.5	47
FA-173	78	8.5	48	98.5	8	47
FA-174	63	8.5	42	98	7	45.5
FA-175	66.5	14	52	99	9	45.5
FA-176	76	13.5	40	99	7	43
FA-177	77.5	11	36	98	9	42.5
FA-178	78.5	7.5	44	99	9	46
FA-179	82	9	44	98.5	5.5	45
FA-180	70	6	36	98	6	44
FA-181	67.5	13	48	98	8.5	42.5
FA-182	67	9	48	99.5	6	44
FA-183	80.5	9	48	99.5	8	35
FA-184	78	9	60	98.5	5	36.5
FA-185	81.5	9	36	100	9	31
FA-186	93.5	9	44	100.5	8	33
FA-187	81.5	11	52	99	9	35
FA-188	76.5	8	58	97	7.5	34.5
FA-189	66.5	6	64	98	9	35.5

## Sheet: Zn20
line #	Plant height (cm)	spike height (cm)	no. of grains/spike	Days to 50% heading	no. of tillers	1000 grain weight (g)
	average	average	average	average	average	average
FA-1	72	9.5	56	98.5	7	40
FA-2	77.5	11	44	100	6.5	41.5
FA-3	78	11.5	44	99	7	42
FA-4	81	13	40	99	6	44.5
FA-5	83	11	50	101	7.5	40.5
FA-6	85.5	11	48	100.5	6.5	39
FA-7	86.5	11	56	99	7	39.5
FA-8	77	12	44	99	7	44
FA-9	77	12	56	99	7	37.5
FA-10	75.5	11.5	40	98	7.5	44
FA-11	77	13.5	52	99	7	38.5
FA-12	76	11	54	98.5	5.5	40.5
FA-13	75.5	10	44	98.5	8	41.5
FA-14	79.5	12	48	98.5	5.5	39
FA-15	77	11	50	99.5	5.5	49.5
FA-16	81	9	52	99.5	5	43.5
FA-17	73	12	56	98.5	7.5	43
FA-18	72	11	54	100	6	39.5
FA-19	70	12	50	100.5	6	39
FA-20	79.5	11	40	99	6	39.5
FA-21	81.5	14	36	98.5	7	39.5
FA-22	82	10	46	99.5	6.5	41
FA-23	74.5	14	52	99	5	43.5
FA-24	75.5	11	40	99.5	5.5	42.5
FA-25	77.5	13	56	100	4.5	40
FA-26	81	11	40	100	6	39.5
FA-27	81.5	13.5	52	99	7	33
FA-28	80.5	12	50	99	6.5	45.5
FA-29	75.5	13.5	48	98.5	7	39
FA-30	78.5	11	42	99	6	38.5
FA-31	77	9.5	54	99	6	39.5
FA-32	77	8	44	100	7.5	36.5
FA-33	77	13	50	100.5	6	39.5
FA-34	76	11.5	44	99	7.5	55
FA-35	76	11	9.5	98	5.5	44.5
FA-36	75.5	9	48	99.5	7	29.1
FA-37	76.5	11	54	99	9	42.5
FA-38	81	12	51	99	6.5	53.2
FA-39	70	13.05	51	106	10.5	54
FA-40	79.5	5.05	63.5	97.5	10	38.5
FA-41	70.05	9	19.5	101	11	29
FA-42	83	6	50	97	6.5	45
FA-43	78	11	52	101	5.5	54
FA-44	73.5	11	52	98.5	7	41
FA-45	82.5	13	56	100	6	47
FA-46	110.15	14.05	36.5	97	6	53.5
FA-47	83	12	48	98.5	7.5	45
FA-48	77.5	10	40	100	7.5	43.5
FA-49	74.5	10.5	44	99	7	50
FA-50	74	12	52	99	7.5	51.5
FA-51	76.5	11	52	101	5.5	45
FA-52	74	11	52	100.5	5	33.5
FA-53	76	14	52	99	4	41.5
FA-54	77	10	48	99	6	43
FA-55	77.5	13	52	99	7.5	44
FA-56	78	12.5	56	98	6.5	48.5
FA-57	82.5	11	50	98	6	44.5
FA-58	81	12.5	58	99	7	40
FA-59	79.5	12.5	50	98	5	48.5
FA-60	74	13	50	99.5	6.5	35
FA-61	73.5	11	32	98.5	5	47
FA-62	72	14	52	99.5	5	39.5
FA-63	75	12.5	52	98.5	7.5	48.5
FA-64	80.5	9	44	98.5	6	39
FA-65	75	11	36	99	6	41.5
FA-66	76	9	50	98	7.5	44
FA-67	78.5	9.5	57.5	99	6	50
FA-68	79.5	9	32	99	6	47
FA-69	81.5	10.5	36	98.5	5	48
FA-70	82.5	12.5	48	98	8	42.5
FA-71	80.5	12.5	57.5	99	7.5	44
FA-72	81.5	10	55	99.5	7	45.5
FA-73	77.5	12	53	99	6.5	35
FA-74	78	12	48	99.5	8	36.5
FA-75	77	11	48	101	5	44.5
FA-76	77.5	12.5	52	98.5	5.5	46
FA-77	81	7.5	32	99.5	6	42
FA-78	81	9	40	101	6	43
FA-79	78	12.5	54	98.5	7	33
FA-80	74	13	48	99.5	6	35
FA-81	74	10	44	98	5	44.5
FA-82	73.5	12.5	52	98	5	43.5
FA-83	77	12	54.5	98	6	44
FA-84	86	12.5	49	99	5	46
FA-85	86	10	56	98	6.5	43.5
FA-86	75.5	10	44	99	5	43.5
FA-87	83	11	48	99	5.5	49
FA-88	82	12	46	98.5	5	40
FA-89	87	11.5	46	98	4.5	34.5
FA-90	83	7.5	32	98	6	43
FA-91	82.5	11	48	99	7	39.5
FA-92	83	13	48	98.5	7	37
FA-93	81	14	52	98.5	6	37.5
FA-94	83.5	9.5	52	100.5	6	40
FA-95	79.5	9	39.5	99	7.5	39.5
FA-96	86	7	37.5	99	7	45
FA-97	87	13	44	99	6.5	44
FA-98	79.5	11	54	98.5	6	38
FA-99	79	12.5	54	100	6	39.5
FA-100	79.5	13	56	98.5	5	37
FA-101	78	14	48	100.5	7.5	34.5
FA-102	82.5	11	48	101	6	39.5
FA-103	75.5	11	46	99	8	41
FA-104	77.5	10	44	99	6	38.5
FA-105	77.5	11	56	98.5	6	45.5
FA-106	78.5	11.5	40	98	6.5	38
FA-107	77.5	10	50	98.5	6.5	41.5
FA-108	73.5	11	40	98.5	5	40
FA-109	73	13.5	46	100.5	6	45
FA-110	81.5	12	50	99.5	6	43.5
FA-111	82.5	9.5	38	98.5	7	46
FA-112	77.5	12	44	99.5	6	45.5
FA-113	79.5	11.5	44	98.5	7	43.5
FA-114	84.5	8	44	98.5	5.5	39
FA-115	83	10.5	48	99	5	35
FA-116	85.5	12	64	99	5	39
FA-117	82	10	54	98.5	5	38
FA-118	87.5	12	44	98.5	6.5	40
FA-119	84	13	52	98	6	43
FA-120	84.5	10	44	99	6.5	44
FA-121	84.5	11	40	99	6	43.5
FA-122	83.5	9	44	99	5	44.5
FA-123	76	11	56	100	6.5	40
FA-124	86	10	50	98	5	48.5
FA-125	84.5	12	50	99.5	7	35
FA-126	86	11	48	98.5	5	47
FA-127	83.5	10	48	98.5	5.5	39.5
FA-128	83.5	11	44	99.5	5	48.5
FA-129	85.5	10.5	32	100	6	39.5
FA-130	76	9	32	98.5	6	44.5
FA-131	76	10	40	100	6	40.5
FA-132	79	11	36	98	7.5	37
FA-133	76.5	10.5	40	98.5	6	39
FA-134	74.5	14	64	99	6	44
FA-135	75.5	11	44	98	7	39
FA-136	80.5	11	52	99.5	6	34
FA-137	76	13	36	100	6	44.5
FA-138	75.5	13	44	100.5	5.5	32.5
FA-139	75.5	12	44	98.5	5	39.5
FA-140	76.5	11	50	98.5	4.5	33
FA-141	76.5	13	48	101	5	45
FA-142	77	11.5	40	101	4	45
FA-143	77	11	32	98.5	5.5	44
FA-144	76	10	40	98.5	5	43
FA-145	76	12.5	48	99	7	45
FA-146	78.5	12	40	98	5.5	43
FA-147	79	12.5	48	98	5	41.5
FA-148	74.5	12.5	40	99	6	32.5
FA-149	75.5	12	38	98	4.5	44
FA-150	78	11	46	101	4	44
FA-151	79	13	52	98	7	44.5
FA-152	79.5	11.5	52	100	6	44
FA-153	75.5	12	52	98.5	6.5	43
FA-154	71.5	13	52	99	5.5	39.5
FA-155	76	11	52	99	5	40
FA-156	77.5	12	50	98	6	44
FA-157	80.5	13	44	98.5	5	34.5
FA-158	78	9	32	99	5	34
FA-159	75	12	54	99	4	43
FA-160	75.5	10	36	99	4	42.5
FA-161	75	8	32	99	6	40
FA-162	91.5	11	50	99	5.5	42.5
FA-163	92	13	60	98.5	5	44
FA-164	86	11.5	62	98	6.5	41.5
FA-165	77	12	60	99.5	6.5	40.5
FA-166	86	12	48	99	5	45
FA-167	84.5	11	32	99	5.5	32.5
FA-168	85.5	13	48	98.5	6.5	33
FA-169	81	14	44	98.5	5.5	45
FA-170	81.5	11	40	98.5	5	44
FA-171	83.5	12	36	98.5	6.5	43.5
FA-172	80	13	44	99	6	42
FA-173	78	11	48	99	5	45.5
FA-174	75.5	11	48	100.5	5	44.5
FA-175	81	12	58	98.5	6	45
FA-176	81	8	52	99	6	41.5
FA-177	81.5	11	44	99	6	41
FA-178	83	9	28	98.5	5	45.5
FA-179	81	9	36	99	5.5	32.5
FA-180	80.5	13	46	99.5	5	38
FA-181	73	12	58	98.5	4	34.5
FA-182	74.5	10	52	100	6.5	34
FA-183	76.5	11	56	98.5	5	35
FA-184	76	12	52	98	5	44
FA-185	76.5	10.5	42	98	5.5	45
FA-186	75	13	44	99	5.5	43
FA-187	75	10.5	50	99	4.5	43
FA-188	71.5	11	50	98	4	43
FA-189	77	10	40	99	4.5	45

## Sheet: Cd10+Zn5
line #	Plant height (cm)	spike height (cm)	no. of grains/spike	Days to 50% heading	no. of tillers	1000 grain weight (g)
	average	average	average	average	average	average
FA-1	72.5	4	40	87	3.5	44
FA-2	63	3.75	44	87.5	5	45.5
FA-3	73	4.6	46	88	3.5	44
FA-4	71.5	4.5	48	87.5	4.5	44
FA-5	70.5	5	46	86.5	4	44.5
FA-6	64.5	4.5	44	93	4.5	45
FA-7	67	5.5	60	93	4	44
FA-8	67.5	5.5	38	93	3.5	45
FA-9	64.5	4	46	93.5	5	45.5
FA-10	65.5	4.5	38	93	5	44
FA-11	77	5.25	42	93	4	47
FA-12	74.5	4	42	87.5	4.5	44.5
FA-13	71	4.75	44	85.5	4	45
FA-14	71.5	3.75	42	87.5	4	43
FA-15	76	6	30	87	3.5	42.5
FA-16	79	4.5	42.5	86.5	4.5	44
FA-17	71.5	5.5	42	87	3.5	44.5
FA-18	72	5.25	47.5	87.5	4	45.5
FA-19	73	6	36	92.5	5	46.5
FA-20	75.5	7	30	92	5	45
FA-21	86	4	38	92	5	45
FA-22	76.5	4.25	38	91.5	5	43.5
FA-23	83	5	36	97.5	4.5	38.5
FA-24	80.5	3.75	40	94	4.5	40
FA-25	82	5.75	38	97	4	44
FA-26	81	8.5	40	92.5	4.5	45.5
FA-27	78	4	46	93.5	5	45.5
FA-28	71	3.75	42	92	5	45
FA-29	70.5	3.75	40	91.5	4	46
FA-30	71.5	3.75	40	90.5	4.5	49
FA-31	81.5	4	46	91	4	45.5
FA-32	66	5	46	92.5	3.5	47
FA-33	64	5.25	44	93	3.5	44
FA-34	66.5	4.5	40	93	4.5	45
FA-35	80	9	48	90	5.5	33
FA-36	76.5	4.5	44	91	6	46
FA-37	92.25	13.05	46	86.5	3	24.315
FA-38	58.5	3.75	71	94.5	4.5	46
FA-39	57.05	6	80	96.5	5	40.5
FA-40	68.55	3.8	11	99.5	6	49.05
FA-41	61.5	9.5	21	94.5	6	45
FA-42	76	6	74.5	93.5	4	40.5
FA-43	90	4.5	69	89.5	4	45
FA-44	76.5	4.5	7	86	5	38.5
FA-45	59	5	48	88	3	43
FA-46	58.8	9	52.5	99.5	6	40.5
FA-47	62	3.75	44	98	3.5	43
FA-48	66	3.75	44	92.5	4.5	45
FA-49	66	4	44	93	3.5	46.5
FA-50	70.5	4.25	50	93.5	3	44
FA-51	62	4.5	44	98	3	44.5
FA-52	76.5	4.75	46	97	4	44.5
FA-53	80.5	6	38	96	4.5	44.5
FA-54	71.5	4.5	38	96.5	3.5	46
FA-55	70.5	5.5	46	97	3.5	46
FA-56	64	5.5	48	94.5	4	43.5
FA-57	64.5	5.25	50	98	3.5	45.5
FA-58	66	3.75	36	99	5	45.5
FA-59	68	4.5	46	97.5	5	45
FA-60	70	5.5	38	97.5	3.5	44.5
FA-61	66	7	48	97	3	46
FA-62	67.5	4.5	42	97	4.5	43.5
FA-63	68.5	4	44	92	3.5	44
FA-64	67	4.45	38	92	3.5	45
FA-65	75	4.5	36	88	4.5	44.5
FA-66	75.5	4.25	40	87.5	3	44.5
FA-67	73	4.6	46	87.5	4.5	43
FA-68	65.5	7	34	93.5	5	46.5
FA-69	72	8	42	97.5	5	45
FA-70	74.5	7	38	97.5	3.5	45
FA-71	81	6	44	98	5	47
FA-72	78	4	38	97.5	5	45
FA-73	82	5	48	96.5	3.5	47.5
FA-74	74.5	4	50	93.5	4.5	47
FA-75	77	4.5	54	85	4.5	44.5
FA-76	75	5.5	44	92.5	3.5	44
FA-77	74	4	42	91.5	3	44
FA-78	78.5	7	40	92.5	4.5	44.5
FA-79	73.5	5.5	42	94	4.5	46
FA-80	77	4	44	98.5	4	45
FA-81	76.5	6.5	44	92	5	44
FA-82	75.5	5.5	44	93	3.5	44
FA-83	67.5	5.25	44	98	4.5	46.5
FA-84	73.5	5	40	93.5	4.5	47.5
FA-85	77.5	5.25	40.5	90.5	3.5	45
FA-86	71.5	4.75	46	93	4	41.5
FA-87	73.5	4.5	55	93	3.5	44.5
FA-88	73.5	5.5	49.5	92.5	5	46
FA-89	75.5	3.75	47	94	5.5	44
FA-90	74.5	4.6	51.5	91	4	43
FA-91	76	5.5	41.5	92	3.5	41
FA-92	78	6	46	95.5	4	44.5
FA-93	80	4.5	38.5	96	4.5	45.5
FA-94	76	6.5	46	89.5	3	46
FA-95	79.5	5.5	42.5	88.5	5	43.5
FA-96	74	4	43	88	4.5	44
FA-97	76	4.5	42	93.5	5	46
FA-98	76	6.25	42.5	89	4	46.5
FA-99	76	4	51	86	4.5	45.5
FA-100	76	4.5	42.5	87.5	4.5	46.5
FA-101	80.5	3.5	51.5	88.5	3.5	44.5
FA-102	69	7	55.5	93	5	42.5
FA-103	68	4	47	93	4	45
FA-104	71.5	4.5	45	93.5	4.5	46
FA-105	72.5	5.75	53	98.5	3.5	42.5
FA-106	75.5	4.5	42	91	4	44.5
FA-107	74	4.5	44	91	3.5	44
FA-108	80	5	45	93	4.5	44.5
FA-109	75.5	5.5	43.5	97.5	3.5	44
FA-110	78	5.25	44	99	5.5	43
FA-111	79.5	5	42.5	97.5	4	44
FA-112	72	4	45	98.5	3.5	39.5
FA-113	70.5	3.75	52	98.5	3.5	47
FA-114	81.5	3.75	47	94	4	46
FA-115	70	3.75	53	93	4	45.5
FA-116	68.5	4	42	92.5	4	46.5
FA-117	68.5	5	45.5	92	4.5	46.5
FA-118	73.5	5.25	44	92.5	3.5	45
FA-119	81	4.5	44	96.5	4	43.5
FA-120	71	7	44	94	3.5	42.5
FA-121	69.5	4.5	49.5	92.5	3.5	42
FA-122	66.5	4.5	44.5	92	4.5	49
FA-123	78	7.5	56.5	92.5	5	45
FA-124	77	4.5	60.5	96	3	43.5
FA-125	81	8.5	60	90.5	4.5	43.5
FA-126	68.5	5.5	60.5	97	4	44.5
FA-127	67	5.25	57	96.5	4.5	44.5
FA-128	71.5	5.5	50.5	96.5	5	46.5
FA-129	73	5	52	97	4	43.5
FA-130	72	5.5	46	99	4	43
FA-131	75	6	60.5	92.5	3.5	45
FA-132	70	5	54.5	94	4	46
FA-133	72.5	4	49	91	5	45
FA-134	68.5	8	58	92	3	46
FA-135	64.5	8	60	95.5	5	44.5
FA-136	65	4	61.5	96	4.5	45.5
FA-137	72.5	4.25	56	89.5	5	46.5
FA-138	68.5	4.5	50.5	88.5	5.5	44.5
FA-139	65.5	4	55	88	3	44.5
FA-140	70.5	5	61	93.5	4.5	42
FA-141	72	4.5	65.5	90	4	44.5
FA-142	67	4	59.5	94	4.5	43
FA-143	70.5	5	61.5	92	4.5	42.5
FA-144	73	5	65.5	93	3.5	41.5
FA-145	70.5	5	70.5	97.5	5	46.5
FA-146	67	4	75	97	3.5	46.5
FA-147	67.5	5	70.5	96.5	4	46.5
FA-148	65	5	72	95	4	46.5
FA-149	70.5	4	69.5	92.5	5.5	43.5
FA-150	72	4	46.5	97.5	5	44.5
FA-151	68	3.75	71	98	3.5	43.5
FA-152	68.5	4.5	33	98.5	3.5	45.5
FA-153	77	4.75	57	93.5	4.5	46
FA-154	68	4.5	69	92.5	4.5	43.5
FA-155	68	4.5	60	92	3.5	44
FA-156	70.5	5	60	90.5	4	42.5
FA-157	76	5.5	56	97	4	43.5
FA-158	77.5	4.25	59.5	96.5	4.5	42.5
FA-159	66.5	4	60.5	96.5	3.5	44.5
FA-160	65.5	4	60.5	97	3	47
FA-161	72.5	5	66.5	99	4	45
FA-162	81	4	70	92.5	3.5	45.5
FA-163	68	4	74.5	94	5	46
FA-164	67.5	4.5	67	91	3	43.5
FA-165	77	4.25	61	92	3.5	45.5
FA-166	72	3.75	64.5	88.5	3.5	45
FA-167	72	5	54	90	3.5	46
FA-168	70.5	4	57	91.5	4.5	44.5
FA-169	76.5	4.5	66	91	4	43
FA-170	81	4.75	65	90	3.5	42.5
FA-171	74	5.5	67	94	3.5	41
FA-172	70.5	6	66.5	92	4.5	37.5
FA-173	77	6	70	93	4.5	44
FA-174	71	8	70.5	97.5	3	45
FA-175	67.5	7.5	76	97	4	43
FA-176	72.5	4	75	96.5	4.5	43
FA-177	76.5	6	66	95	5	45
FA-178	76	5	66.5	92.5	4	45
FA-179	80.5	5.25	77.5	97.5	5	46
FA-180	72	3.75	65.5	98	4	44
FA-181	71.5	4	68	98.5	3.5	43
FA-182	80.5	8	69.5	92	4.5	42.5
FA-183	75	6.5	59.5	93	4	44.5
FA-184	69.5	4	60.5	92	3	37.5
FA-185	70	4.25	65	96	4	39.5
FA-186	72.5	4.5	71.5	92	4.5	38.5
FA-187	72	5	72.5	91.5	5.5	44.5
FA-188	76	4	66	89	3.5	35.5
FA-189	67.5	6.5	60.5	98.5	3	43.5

## Sheet: Cd10+Zn20
line #	Plant height (cm)	spike height (cm)	no. of grains/spike	Days to 50% heading	no. of tillers	1000 grain weight (g)
	average	average	average	average	average	average
FA-1	67.5	9	45.5	99	4.5	34
FA-2	66.5	8	40	99.5	5	32.5
FA-3	72.5	8.5	42	100.5	5	32
FA-4	81.5	7	46	100	5	46
FA-5	78	6	36	101	4.5	45
FA-6	76.5	8	38	100.5	4.5	45.5
FA-7	68.5	9.5	34	101	4	43.5
FA-8	70	7.5	38	100.5	4	44
FA-9	73.5	6.5	38	101	4.5	36
FA-10	72	7.5	34	99	5	45.5
FA-11	78	5	40	99	4	45
FA-12	72	5.25	28	99.5	4	45
FA-13	71.5	6	36	99.5	4.5	41.5
FA-14	75.5	5.5	42	101	4	41
FA-15	66.5	8.5	38	100.5	5	46.5
FA-16	77	7	38	102	4	37.5
FA-17	72	7.5	28	100	4	34
FA-18	77.5	8.5	46	99.5	4	45
FA-19	66	6	48	101	5	43
FA-20	73	6	46	100.5	5	44
FA-21	68.5	6.5	44	102.5	5	44
FA-22	77	9	34	103.5	4.5	43
FA-23	79	6	36	102	4.5	45.5
FA-24	72.5	5.5	38	99	4.5	45
FA-25	72	7.5	42	99	5.5	46
FA-26	76	7	46	101	5	44
FA-27	86.5	6	42	101.5	5	44
FA-28	72	7	44	102	5	42
FA-29	77.5	6	34	99	5	34
FA-30	67.5	4.75	30	99	5	43
FA-31	70.5	7	44	99	4.5	40
FA-32	67	7	30	99	4	45
FA-33	72	9	40	99.5	4	35.5
FA-34	77	8	40	99	4.5	42.5
FA-35	56	5.5	72.5	101.5	4	42
FA-36	69	5.1	38	104	4	44
FA-37	60.3	9	79	105.5	6	22.55
FA-38	94.05	7.5	38	106	5.5	44.5
FA-39	56	12.45	29.5	99	5	46.6
FA-40	55.75	8	32	106.5	5.5	26
FA-41	76	6.5	10	104	6	34.5
FA-42	62	5.5	38	101.5	5	44
FA-43	62.5	6.5	38	101.5	4	45.5
FA-44	75.5	5	38	102	5	33
FA-45	89.5	7.5	40	101.5	5.5	46
FA-46	55	5.5	44	99	6	41.5
FA-47	71.5	6	40	101.5	5	47
FA-48	74.5	8.5	46	101.5	4.5	43.5
FA-49	67.5	7	32	102	4.5	43
FA-50	76.5	7.5	38	101.5	4.5	46
FA-51	76.5	5	36	99	5.5	41.5
FA-52	75.5	5.5	34	99	4.5	45.5
FA-53	77	7	30	99	5	45.5
FA-54	75.5	8.5	32	99.5	5.5	43.5
FA-55	75	6	32	100.5	5	45.5
FA-56	76	7	32	100	5	39.5
FA-57	71	6	30	101	6	38
FA-58	73.5	8.5	72.5	100.5	5	40
FA-59	73	9	42	101	5	34
FA-60	84.5	9	32	100.5	5.5	37
FA-61	67.5	9	40	101	4	36
FA-62	65	9	36	99	4.5	45
FA-63	68	8	36	99	4.5	44.5
FA-64	72.5	6	46	99.5	4	32.5
FA-65	69.5	8	61.5	101	5.5	44
FA-66	74.5	10	61	100.5	4	45.5
FA-67	64	9	62	101	4.5	44.5
FA-68	70	7	67	102	5	45
FA-69	71	8	34	101.5	5	43.5
FA-70	75.5	6	40	99.5	4	45
FA-71	77	7	40	101	4.5	46
FA-72	72.5	6.5	38	100.5	5.5	43
FA-73	63	8	38	100.5	4.5	46
FA-74	66	8.5	36	99	5	47.5
FA-75	68	5	40	99	4	45.5
FA-76	72	7	34	99	5.5	45.5
FA-77	75	6	38	99.5	5	43.5
FA-78	72.5	7.5	40	101	4	44.5
FA-79	73	5	38	100.5	5	40
FA-80	77	8	34	101	5	39.5
FA-81	78.5	7.5	38	100.5	5	46
FA-82	80	6.5	46	101	5.5	37
FA-83	78	6	46	99	5	44
FA-84	77	8	36	99.5	5	45.5
FA-85	83	6	36	99.5	5	45
FA-86	79	6.5	40	101	4.5	41
FA-87	72.5	5	34	100.5	4.5	46
FA-88	72	6	40	101	5	41
FA-89	76	6.5	34	101	5	35
FA-90	86.5	6	30	100.5	5	33
FA-91	72	6	34	101	5	41.5
FA-92	77.5	9	42	102	5	42.5
FA-93	67.5	6.5	38	101.5	4.5	44.5
FA-94	70.5	7	38	99.5	5.5	43.5
FA-95	67	9	38	101	4	46
FA-96	72	5.5	30	100.5	4.5	40.5
FA-97	77	7	38	100.5	5.5	45
FA-98	72	6.5	36	99	5.5	45.5
FA-99	68	8.5	34	99	5	47
FA-100	71	5	34	99	6	45.5
FA-101	73	7.5	38	99	4	44.5
FA-102	76	7.5	36	99	5	46
FA-103	76.5	5.5	46	99.5	5	45
FA-104	82	5.5	36	99.5	4.5	40
FA-105	66.5	5	40	101	5	45
FA-106	72.5	7	46	100.5	4.5	42
FA-107	75.5	5	34	101.5	5.5	43.5
FA-108	78	7.5	38	103.5	5.5	39
FA-109	76.5	6.5	34	103	5.5	41
FA-110	75.5	6	36	102	4	41.5
FA-111	73	6	42	100.5	6	44.5
FA-112	78	7	44	101	5.5	44
FA-113	70	7	42	99	6	40.5
FA-114	74	6	42	99	5	44.5
FA-115	72	7	42	99	6	44.5
FA-116	69.5	7	38	99	4.5	41.5
FA-117	84.5	5	32	99	5	44.5
FA-118	67.5	6	34	99	4.5	41.5
FA-119	65	7	44	99.5	5	43
FA-120	72	5.5	46	99.5	5	46
FA-121	80	8	32	100	5.5	43.5
FA-122	77	7	40	103	5.5	44
FA-123	78	7.5	34	102	5	47.5
FA-124	59.5	5	40	103	6	41.5
FA-125	65	7	38	102	5.5	44.5
FA-126	66.5	7	38	103	6	33
FA-127	67.5	5.5	38	101.5	6	44.5
FA-128	81	7	36	100	6	45.5
FA-129	66	5.5	32	100	6	43
FA-130	67.5	7	36	100	5	42
FA-131	71.5	5.5	30	99	4	46
FA-132	72	6.5	38	99	6	46.5
FA-133	76	8	44	99	4.5	46
FA-134	75.5	5	32	99.5	6	44.5
FA-135	82	6.5	38	99	5	44.5
FA-136	71.5	7	38	99.5	5	42.5
FA-137	77	8.5	36	102.5	5	46
FA-138	80	6	36	102	5	45.5
FA-139	82	7.5	30	101	6	33
FA-140	73	6	40	100.5	6	34.5
FA-141	78	8	38	103	5	41.5
FA-142	81	5	30	99	5	45
FA-143	82.5	7.5	36	99.5	4.5	45.5
FA-144	72	7.5	36	102	4	45.5
FA-145	73.5	7	36	102.5	4	45.5
FA-146	66	8	36	101	5	45.5
FA-147	68	7	36	100.5	5	44.5
FA-148	71.5	6	36	101	5.5	38.5
FA-149	82	5	34	99	5.5	32.5
FA-150	72	7	40	99.5	5	45.5
FA-151	62.5	6.5	38	99	5.5	44
FA-152	90	6	30	99.5	5	44.5
FA-153	83.5	9	34	101	5	44
FA-154	78	5.5	42	100.5	5.5	34.5
FA-155	71	6	34	102	5.5	33
FA-156	72	8.5	40	102.5	5	34
FA-157	78	6	48.5	101	5.5	34.5
FA-158	76	7.5	34	99	5.5	34
FA-159	81.5	6	71	99	5.5	30.5
FA-160	81.5	7.5	77.5	100	5	32.5
FA-161	77.5	5.5	36	101.5	5	45
FA-162	77	5.5	38	101	5.5	41.5
FA-163	72	8.5	42	100.5	5.5	41
FA-164	74.5	5	42	101	6	44.5
FA-165	66.5	9	30	100.5	5	44
FA-166	67	7	42	101.5	5	43.5
FA-167	77.5	7.5	38	99	5.5	44.5
FA-168	75.5	8	38	99	4	45.5
FA-169	63	6	42	100	5.5	45.5
FA-170	70.5	6.5	60.5	101	5.5	44.5
FA-171	73.5	6.5	36	99	5	44.5
FA-172	80.5	8.5	40	101	6	46
FA-173	79.5	7	36	100.5	5	47
FA-174	81.5	5	34	101	6	44
FA-175	71.5	9.5	30	101	5	45
FA-176	77.5	6.5	34	101	5.5	43
FA-177	67	7	52.5	99	5.5	32
FA-178	70	7.5	46	99	5.5	41.5
FA-179	62	6.5	44	99	5	44
FA-180	72	7	38	99	5	43
FA-181	77	8.5	42	100	4.5	43
FA-182	67	7.5	36	103	5	46
FA-183	67	5.5	32	102	6	45
FA-184	61.5	8	30	103	5	42
FA-185	67	7	34	102	6	42
FA-186	71.5	7.5	38	103	5.5	35
FA-187	76.5	9	71.5	99	5.5	33
FA-188	82	6	38	99.5	5.5	34.5
FA-189	71.5	6	36	99	5.5	33.5
